# Supplementary material
Source: ML conference proceedings conference paper supplement (https://openreview.net/forum?id=3tukjsVyrE)
Supplement: supplementary_material [file attachment]

# 000    FORMATTING INSTRUCTIONS FOR ICLR 2025 001    CONFERENCE SUBMISSIONS

## 004    **Anonymous authors**

005    Paper under double-blind review

## 008                                    ABSTRACT

009            The abstract paragraph should be indented 1/2 inch (3 picas) on both left and right-  
010            hand margins. Use 10 point type, with a vertical spacing of 11 points. The word  
011            ABSTRACT must be centered, in small caps, and in point size 12. Two line spaces  
012            precede the abstract. The abstract must be limited to one paragraph.

## 015    1    SUBMISSION OF CONFERENCE PAPERS TO ICLR 2025

016    ICLR requires electronic submissions, processed by <https://openreview.net/>. See ICLR’s  
017    website for more instructions.

018    If your paper is ultimately accepted, the statement `\iclrfinalcopy` should be inserted to adjust  
019    the format to the camera ready requirements.

020    The format for the submissions is a variant of the NeurIPS format. Please read carefully the instruc-  
021    tions below, and follow them faithfully.

### 022    1.1    STYLE

023    Papers to be submitted to ICLR 2025 must be prepared according to the instructions presented here.

024    Authors are required to use the ICLR  $\LaTeX$  style files obtainable at the ICLR website. Please make  
025    sure you use the current files and not previous versions. Tweaking the style files may be grounds for  
026    rejection.

### 027    1.2    RETRIEVAL OF STYLE FILES

028    The style files for ICLR and other conference information are available online at:

029                                    <http://www.iclr.cc/>

030    The file `iclr2025_conference.pdf` contains these instructions and illustrates the various  
031    formatting requirements your ICLR paper must satisfy. Submissions must be made using  $\LaTeX$  and  
032    the style files `iclr2025_conference.sty` and `iclr2025_conference.bst` (to be used  
033    with  $\LaTeX2e$ ). The file `iclr2025_conference.tex` may be used as a “shell” for writing your  
034    paper. All you have to do is replace the author, title, abstract, and text of the paper with your own.

035    The formatting instructions contained in these style files are summarized in sections 2, 3, and 4  
036    below.

## 037    2    GENERAL FORMATTING INSTRUCTIONS

038    The text must be confined within a rectangle 5.5 inches (33 picas) wide and 9 inches (54 picas) long.  
039    The left margin is 1.5 inch (9 picas). Use 10 point type with a vertical spacing of 11 points. Times  
040    New Roman is the preferred typeface throughout. Paragraphs are separated by 1/2 line space, with  
041    no indentation.

042    Paper title is 17 point, in small caps and left-aligned. All pages should start at 1 inch (6 picas) from  
043    the top of the page.

054 Authors' names are set in boldface, and each name is placed above its corresponding address. The  
055 lead author's name is to be listed first, and the co-authors' names are set to follow. Authors sharing  
056 the same address can be on the same line.

057 Please pay special attention to the instructions in section 4 regarding figures, tables, acknowledg-  
058 ments, and references.

060 There will be a strict upper limit of 10 pages for the main text of the initial submission, with unlim-  
061 ited additional pages for citations.

062

### 063 3 HEADINGS: FIRST LEVEL

064

065 First level headings are in small caps, flush left and in point size 12. One line space before the first  
066 level heading and 1/2 line space after the first level heading.

067

#### 068 3.1 HEADINGS: SECOND LEVEL

069

070 Second level headings are in small caps, flush left and in point size 10. One line space before the  
071 second level heading and 1/2 line space after the second level heading.

072

##### 073 3.1.1 HEADINGS: THIRD LEVEL

074

075 Third level headings are in small caps, flush left and in point size 10. One line space before the third  
076 level heading and 1/2 line space after the third level heading.

077

## 078 4 CITATIONS, FIGURES, TABLES, REFERENCES

079

080 These instructions apply to everyone, regardless of the formatter being used.

081

### 082 4.1 CITATIONS WITHIN THE TEXT

083

084 Citations within the text should be based on the `natbib` package and include the authors' last names  
085 and year (with the "et al." construct for more than two authors). When the authors or the publication  
086 are included in the sentence, the citation should not be in parenthesis using `\citet{}` (as in "See  
087 Hinton et al. (2006) for more information."). Otherwise, the citation should be in parenthesis using  
088 `\citep{}` (as in "Deep learning shows promise to make progress towards AI (Bengio & LeCun,  
089 2007).").

090 The corresponding references are to be listed in alphabetical order of authors, in the REFERENCES  
091 section. As to the format of the references themselves, any style is acceptable as long as it is used  
092 consistently.

093

### 094 4.2 FOOTNOTES

095

096 Indicate footnotes with a number<sup>1</sup> in the text. Place the footnotes at the bottom of the page on which  
097 they appear. Precede the footnote with a horizontal rule of 2 inches (12 picas).<sup>2</sup>

098

### 099 4.3 FIGURES

100

101 All artwork must be neat, clean, and legible. Lines should be dark enough for purposes of repro-  
102 duction; art work should not be hand-drawn. The figure number and caption always appear after the  
103 figure. Place one line space before the figure caption, and one line space after the figure. The figure  
caption is lower case (except for first word and proper nouns); figures are numbered consecutively.

104 Make sure the figure caption does not get separated from the figure. Leave sufficient space to avoid  
105 splitting the figure and figure caption.

106

---

107 <sup>1</sup>Sample of the first footnote

<sup>2</sup>Sample of the second footnote

108  
 109  
 110  
 111  
 112  
 113  
 114  
 115  
 116  
 117  
 118  
 119  
 120  
 121  
 122  
 123  
 124  
 125  
 126  
 127  
 128  
 129  
 130  
 131  
 132  
 133  
 134  
 135  
 136  
 137  
 138  
 139  
 140  
 141  
 142  
 143  
 144  
 145  
 146  
 147  
 148  
 149  
 150  
 151  
 152  
 153  
 154  
 155  
 156  
 157  
 158  
 159  
 160  
 161

Table 1: Sample table title

| <b>PART</b> | <b>DESCRIPTION</b>                |
|-------------|-----------------------------------|
| Dendrite    | Input terminal                    |
| Axon        | Output terminal                   |
| Soma        | Cell body (contains cell nucleus) |

You may use color figures. However, it is best for the figure captions and the paper body to make sense if the paper is printed either in black/white or in color.

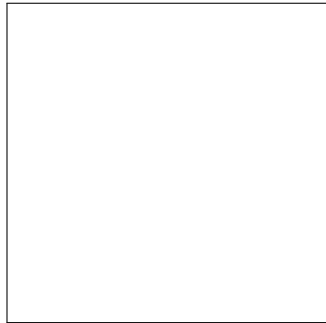

Figure 1: Sample figure caption.

#### 4.4 TABLES

All tables must be centered, neat, clean and legible. Do not use hand-drawn tables. The table number and title always appear before the table. See Table 1.

Place one line space before the table title, one line space after the table title, and one line space after the table. The table title must be lower case (except for first word and proper nouns); tables are numbered consecutively.

## 5 DEFAULT NOTATION

In an attempt to encourage standardized notation, we have included the notation file from the textbook, *Deep Learning* Goodfellow et al. (2016) available at [https://github.com/goodfeli/dlbook\\_notation/](https://github.com/goodfeli/dlbook_notation/). Use of this style is not required and can be disabled by commenting out `math_commands.tex`.

### Numbers and Arrays

|     |                           |                                                                                |
|-----|---------------------------|--------------------------------------------------------------------------------|
| 162 | $a$                       | A scalar (integer or real)                                                     |
| 163 | $\mathbf{a}$              | A vector                                                                       |
| 164 | $\mathbf{A}$              | A matrix                                                                       |
| 165 | $\mathbf{A}$              | A matrix                                                                       |
| 166 | $\mathbf{A}$              | A tensor                                                                       |
| 167 | $\mathbf{A}$              | A tensor                                                                       |
| 168 | $I_n$                     | Identity matrix with $n$ rows and $n$ columns                                  |
| 169 | $I$                       | Identity matrix with dimensionality implied by context                         |
| 170 | $e^{(i)}$                 | Standard basis vector $[0, \dots, 0, 1, 0, \dots, 0]$ with a 1 at position $i$ |
| 171 | $e^{(i)}$                 | Standard basis vector $[0, \dots, 0, 1, 0, \dots, 0]$ with a 1 at position $i$ |
| 172 | $e^{(i)}$                 | Standard basis vector $[0, \dots, 0, 1, 0, \dots, 0]$ with a 1 at position $i$ |
| 173 | $\text{diag}(\mathbf{a})$ | A square, diagonal matrix with diagonal entries given by $\mathbf{a}$          |
| 174 | $\mathbf{a}$              | A scalar random variable                                                       |
| 175 | $\mathbf{a}$              | A scalar random variable                                                       |
| 176 | $\mathbf{a}$              | A vector-valued random variable                                                |
| 177 | $\mathbf{A}$              | A matrix-valued random variable                                                |
| 178 | $\mathbf{A}$              | A matrix-valued random variable                                                |

### Sets and Graphs

|     |                                   |                                                                                                     |
|-----|-----------------------------------|-----------------------------------------------------------------------------------------------------|
| 180 | $\mathbb{A}$                      | A set                                                                                               |
| 181 | $\mathbb{A}$                      | A set                                                                                               |
| 182 | $\mathbb{R}$                      | The set of real numbers                                                                             |
| 183 | $\{0, 1\}$                        | The set containing 0 and 1                                                                          |
| 184 | $\{0, 1, \dots, n\}$              | The set of all integers between 0 and $n$                                                           |
| 185 | $\{0, 1, \dots, n\}$              | The set of all integers between 0 and $n$                                                           |
| 186 | $[a, b]$                          | The real interval including $a$ and $b$                                                             |
| 187 | $(a, b]$                          | The real interval excluding $a$ but including $b$                                                   |
| 188 | $(a, b]$                          | The real interval excluding $a$ but including $b$                                                   |
| 189 | $\mathbb{A} \setminus \mathbb{B}$ | Set subtraction, i.e., the set containing the elements of $\mathbb{A}$ that are not in $\mathbb{B}$ |
| 190 | $\mathbb{A} \setminus \mathbb{B}$ | Set subtraction, i.e., the set containing the elements of $\mathbb{A}$ that are not in $\mathbb{B}$ |
| 191 | $\mathcal{G}$                     | A graph                                                                                             |
| 192 | $\mathcal{G}$                     | A graph                                                                                             |
| 193 | $\text{Pa}_{\mathcal{G}}(x_i)$    | The parents of $x_i$ in $\mathcal{G}$                                                               |

### Indexing

|     |                        |                                                                  |
|-----|------------------------|------------------------------------------------------------------|
| 195 | $a_i$                  | Element $i$ of vector $\mathbf{a}$ , with indexing starting at 1 |
| 196 | $a_i$                  | Element $i$ of vector $\mathbf{a}$ , with indexing starting at 1 |
| 197 | $a_{-i}$               | All elements of vector $\mathbf{a}$ except for element $i$       |
| 198 | $A_{i,j}$              | Element $i, j$ of matrix $\mathbf{A}$                            |
| 199 | $A_{i,j}$              | Element $i, j$ of matrix $\mathbf{A}$                            |
| 200 | $\mathbf{A}_{i,:}$     | Row $i$ of matrix $\mathbf{A}$                                   |
| 201 | $\mathbf{A}_{:,i}$     | Column $i$ of matrix $\mathbf{A}$                                |
| 202 | $\mathbf{A}_{:,i}$     | Column $i$ of matrix $\mathbf{A}$                                |
| 203 | $\mathbf{A}_{i,j,k}$   | Element $(i, j, k)$ of a 3-D tensor $\mathbf{A}$                 |
| 204 | $\mathbf{A}_{:, :, i}$ | 2-D slice of a 3-D tensor                                        |
| 205 | $\mathbf{A}_{:, :, i}$ | 2-D slice of a 3-D tensor                                        |
| 206 | $\mathbf{a}_i$         | Element $i$ of the random vector $\mathbf{a}$                    |

### Calculus

207  
208  
209  
210  
211  
212  
213  
214  
215

|     |                                                             |                                                                                                         |
|-----|-------------------------------------------------------------|---------------------------------------------------------------------------------------------------------|
| 216 | $\frac{dy}{dx}$                                             | Derivative of $y$ with respect to $x$                                                                   |
| 217 | $\frac{\partial y}{\partial x}$                             | Partial derivative of $y$ with respect to $x$                                                           |
| 218 | $\nabla_{\mathbf{x}} y$                                     | Gradient of $y$ with respect to $\mathbf{x}$                                                            |
| 219 | $\nabla_{\mathbf{X}} y$                                     | Matrix derivatives of $y$ with respect to $\mathbf{X}$                                                  |
| 220 | $\nabla_{\mathbf{x}}^2 f(x)$ or $\mathbf{H}(f)(\mathbf{x})$ | Tensor containing derivatives of $y$ with respect to $\mathbf{X}$                                       |
| 221 | $\frac{\partial f}{\partial \mathbf{x}}$                    | Jacobian matrix $\mathbf{J} \in \mathbb{R}^{m \times n}$ of $f : \mathbb{R}^n \rightarrow \mathbb{R}^m$ |
| 222 | $\int f(\mathbf{x}) d\mathbf{x}$                            | The Hessian matrix of $f$ at input point $\mathbf{x}$                                                   |
| 223 | $\int_{\mathbb{S}} f(\mathbf{x}) d\mathbf{x}$               | Definite integral over the entire domain of $\mathbf{x}$                                                |
| 224 |                                                             | Definite integral with respect to $\mathbf{x}$ over the set $\mathbb{S}$                                |
| 225 |                                                             |                                                                                                         |
| 226 |                                                             |                                                                                                         |
| 227 |                                                             |                                                                                                         |
| 228 |                                                             |                                                                                                         |
| 229 |                                                             |                                                                                                         |
| 230 |                                                             |                                                                                                         |
| 231 |                                                             |                                                                                                         |
| 232 |                                                             |                                                                                                         |
| 233 |                                                             |                                                                                                         |
| 234 |                                                             |                                                                                                         |
| 235 |                                                             |                                                                                                         |
| 236 |                                                             |                                                                                                         |
| 237 |                                                             |                                                                                                         |
| 238 |                                                             |                                                                                                         |
| 239 |                                                             |                                                                                                         |
| 240 |                                                             |                                                                                                         |
| 241 |                                                             |                                                                                                         |
| 242 |                                                             |                                                                                                         |
| 243 |                                                             |                                                                                                         |
| 244 |                                                             |                                                                                                         |
| 245 |                                                             |                                                                                                         |
| 246 |                                                             |                                                                                                         |
| 247 |                                                             |                                                                                                         |
| 248 |                                                             |                                                                                                         |
| 249 |                                                             |                                                                                                         |
| 250 |                                                             |                                                                                                         |
| 251 |                                                             |                                                                                                         |
| 252 |                                                             |                                                                                                         |
| 253 |                                                             |                                                                                                         |
| 254 |                                                             |                                                                                                         |
| 255 |                                                             |                                                                                                         |
| 256 |                                                             |                                                                                                         |
| 257 |                                                             |                                                                                                         |
| 258 |                                                             |                                                                                                         |
| 259 |                                                             |                                                                                                         |
| 260 |                                                             |                                                                                                         |
| 261 |                                                             |                                                                                                         |
| 262 |                                                             |                                                                                                         |
| 263 |                                                             |                                                                                                         |
| 264 |                                                             |                                                                                                         |
| 265 |                                                             |                                                                                                         |
| 266 |                                                             |                                                                                                         |
| 267 |                                                             |                                                                                                         |
| 268 |                                                             |                                                                                                         |
| 269 |                                                             |                                                                                                         |

### Probability and Information Theory

|     |                                                                  |                                                                                                             |
|-----|------------------------------------------------------------------|-------------------------------------------------------------------------------------------------------------|
| 233 | $P(a)$                                                           | A probability distribution over a discrete variable                                                         |
| 234 | $p(a)$                                                           | A probability distribution over a continuous variable, or over a variable whose type has not been specified |
| 235 | $a \sim P$                                                       | Random variable $a$ has distribution $P$                                                                    |
| 236 | $\mathbb{E}_{x \sim P}[f(x)]$ or $\mathbb{E}f(x)$                | Expectation of $f(x)$ with respect to $P(x)$                                                                |
| 237 | $\text{Var}(f(x))$                                               | Variance of $f(x)$ under $P(x)$                                                                             |
| 238 | $\text{Cov}(f(x), g(x))$                                         | Covariance of $f(x)$ and $g(x)$ under $P(x)$                                                                |
| 239 | $H(x)$                                                           | Shannon entropy of the random variable $x$                                                                  |
| 240 | $D_{\text{KL}}(P  Q)$                                            | Kullback-Leibler divergence of $P$ and $Q$                                                                  |
| 241 | $\mathcal{N}(\mathbf{x}; \boldsymbol{\mu}, \boldsymbol{\Sigma})$ | Gaussian distribution over $\mathbf{x}$ with mean $\boldsymbol{\mu}$ and covariance $\boldsymbol{\Sigma}$   |

### Functions

|     |                                         |                                                                                                                                                                         |
|-----|-----------------------------------------|-------------------------------------------------------------------------------------------------------------------------------------------------------------------------|
| 249 | $f : \mathbb{A} \rightarrow \mathbb{B}$ | The function $f$ with domain $\mathbb{A}$ and range $\mathbb{B}$                                                                                                        |
| 250 | $f \circ g$                             | Composition of the functions $f$ and $g$                                                                                                                                |
| 251 | $f(\mathbf{x}; \boldsymbol{\theta})$    | A function of $\mathbf{x}$ parametrized by $\boldsymbol{\theta}$ . (Sometimes we write $f(\mathbf{x})$ and omit the argument $\boldsymbol{\theta}$ to lighten notation) |
| 252 | $\log x$                                | Natural logarithm of $x$                                                                                                                                                |
| 253 | $\sigma(x)$                             | Logistic sigmoid, $\frac{1}{1 + \exp(-x)}$                                                                                                                              |
| 254 | $\zeta(x)$                              | Softplus, $\log(1 + \exp(x))$                                                                                                                                           |
| 255 | $\ \mathbf{x}\ _p$                      | $L^p$ norm of $\mathbf{x}$                                                                                                                                              |
| 256 | $\ \mathbf{x}\ $                        | $L^2$ norm of $\mathbf{x}$                                                                                                                                              |
| 257 | $x^+$                                   | Positive part of $x$ , i.e., $\max(0, x)$                                                                                                                               |
| 258 | $\mathbf{1}_{\text{condition}}$         | is 1 if the condition is true, 0 otherwise                                                                                                                              |

270 6 FINAL INSTRUCTIONS  
271

272 Do not change any aspects of the formatting parameters in the style files. In particular, do not modify  
273 the width or length of the rectangle the text should fit into, and do not change font sizes (except  
274 perhaps in the REFERENCES section; see below). Please note that pages should be numbered.  
275

276 7 PREPARING POSTSCRIPT OR PDF FILES  
277

278 Please prepare PostScript or PDF files with paper size “US Letter”, and not, for example, “A4”. The  
279 `-t letter` option on `dvips` will produce US Letter files.  
280

281 Consider directly generating PDF files using `pdflatex` (especially if you are a MiKTeX user).  
282 PDF figures must be substituted for EPS figures, however.

283 Otherwise, please generate your PostScript and PDF files with the following commands:  
284

```
285 dvips mypaper.dvi -t letter -Ppdf -G0 -o mypaper.ps
286 ps2pdf mypaper.ps mypaper.pdf
287
```

288 7.1 MARGINS IN LATEX  
289

290 Most of the margin problems come from figures positioned by hand using `\special` or other  
291 commands. We suggest using the command `\includegraphics` from the `graphicx` package.  
292 Always specify the figure width as a multiple of the line width as in the example below using `.eps`  
293 `graphics`

```
294 \usepackage[dvips]{graphicx} ...
295 \includegraphics[width=0.8\linewidth]{myfile.eps}
296
```

297 or

```
298 \usepackage[pdftex]{graphicx} ...
299 \includegraphics[width=0.8\linewidth]{myfile.pdf}
300
```

301 for `.pdf` graphics. See section 4.4 in the `graphics` bundle documentation (<http://www.ctan.org/tex-archive/macros/latex/required/graphics/grfguide.ps>)  
302

303 A number of width problems arise when LaTeX cannot properly hyphenate a line. Please give  
304 LaTeX hyphenation hints using the `\-` command.  
305

306 AUTHOR CONTRIBUTIONS  
307

308 If you’d like to, you may include a section for author contributions as is done in many journals. This  
309 is optional and at the discretion of the authors.  
310

## 311 ACKNOWLEDGMENTS

312 Use unnumbered third level headings for the acknowledgments. All acknowledgments, including  
313 those to funding agencies, go at the end of the paper.  
314

315 REFERENCES  
316

317 Yoshua Bengio and Yann LeCun. Scaling learning algorithms towards AI. In *Large Scale Kernel*  
318 *Machines*. MIT Press, 2007.  
319

320 Ian Goodfellow, Yoshua Bengio, Aaron Courville, and Yoshua Bengio. *Deep learning*, volume 1.  
321 MIT Press, 2016.

322 Geoffrey E. Hinton, Simon Osindero, and Yee Whye Teh. A fast learning algorithm for deep belief  
323 nets. *Neural Computation*, 18:1527–1554, 2006.

324  
325  
326  
327  
328  
329  
330  
331  
332  
333  
334  
335  
336  
337  
338  
339  
340  
341  
342  
343  
344  
345  
346  
347  
348  
349  
350  
351  
352  
353  
354  
355  
356  
357  
358  
359  
360  
361  
362  
363  
364  
365  
366  
367  
368  
369  
370  
371  
372  
373  
374  
375  
376  
377

## A APPENDIX

You may include other additional sections here.
