# Supplementary material
Source: ML conference proceedings conference paper supplement (https://openreview.net/forum?id=3tukjsVyrE)

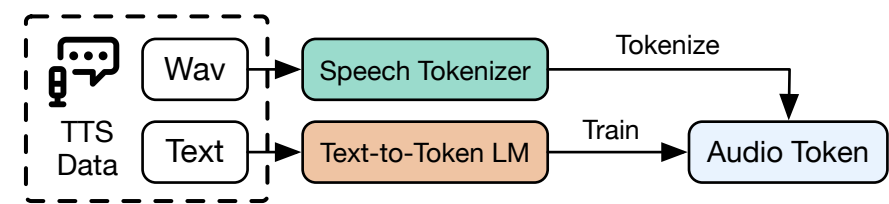

(a) Train a Text-to-Token Model using TTS data

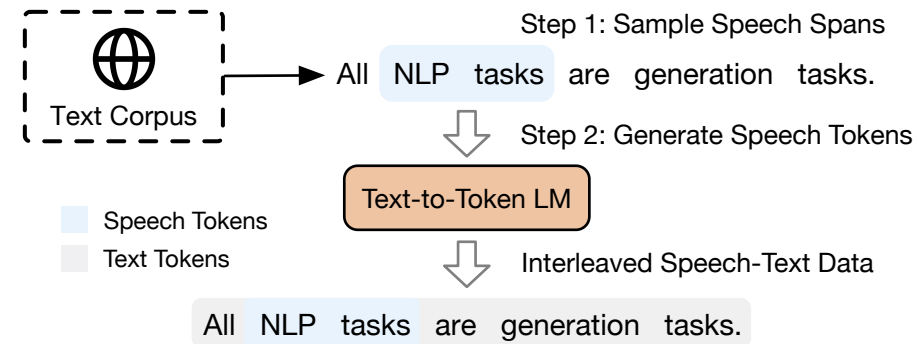

(b) Construct Interleaved Speech-Text Data From Text Corpus

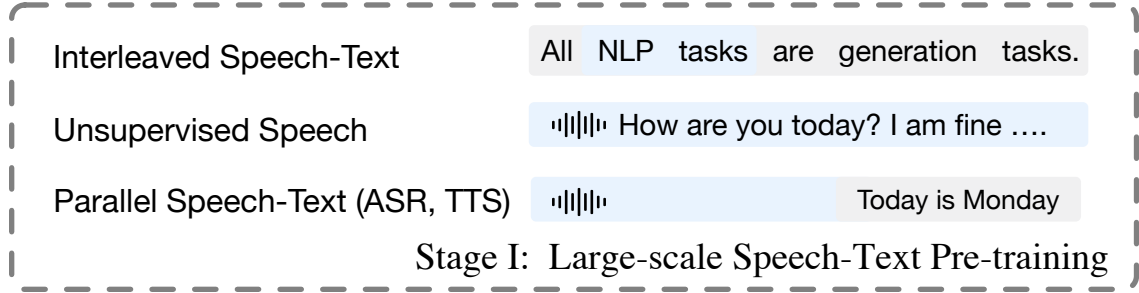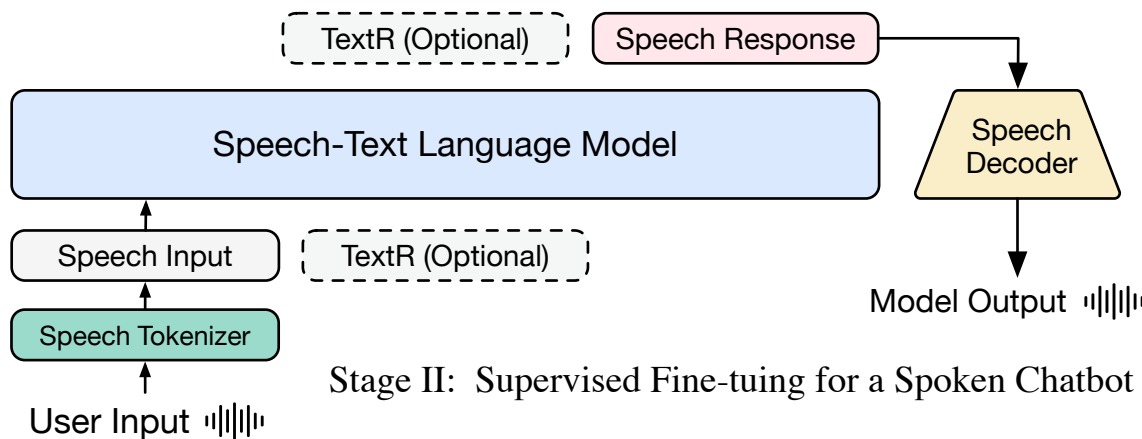

Supplement: supplementary_material [file attachment]
